# Supplementary material for: Synthesis of 1,1,3,3,5,5-Hexamethyl-7,7-diorganocyclotetrasiloxanes and Its Copolymers
Source: MDPI journal article supplement (doi:10.3390/polym14010028), 2021-12-22
Supplement: s1 [file s1]

## Supplementary materials:

### Synthesis of 1,1,3,3,5,5-Hexamethyl-7,7-diorganocyclotetrasiloxanes and its Copolymers

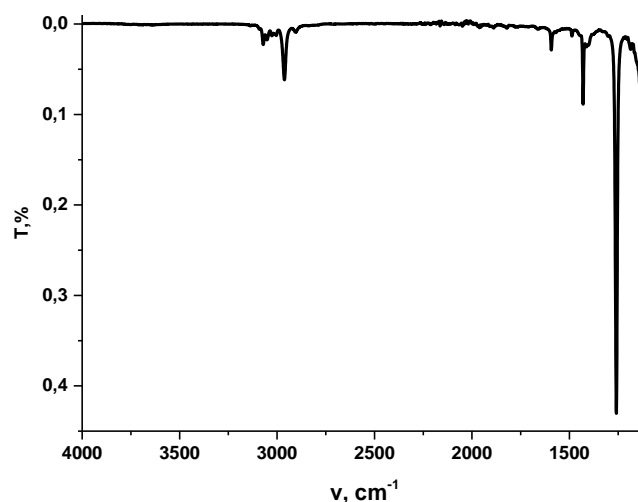

Figure S1. IR spectra of 1,1,3,3,5,5,7-heptamethyl-7-vinylcyclotetrasiloxane

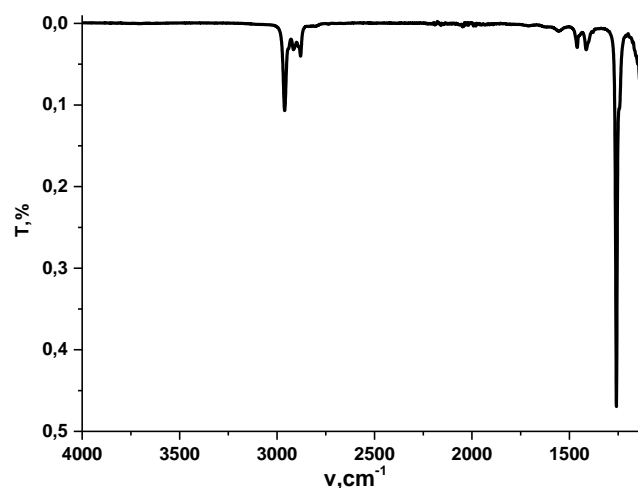

Figure S2. IR spectra of 7,7-diethyl-1,1,3,3,5,5-hexamethylcyclotetrasiloxane

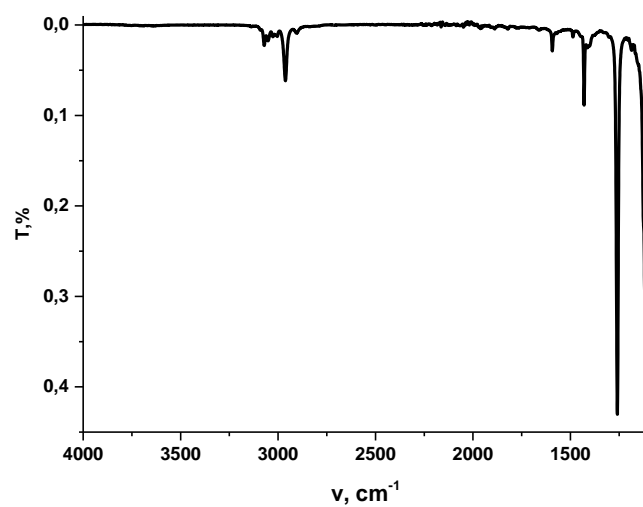

Figure S3. IR spectra of 1,1,3,3,5,5-hexamethyl-7,7-diphenylcyclotetrasiloxane

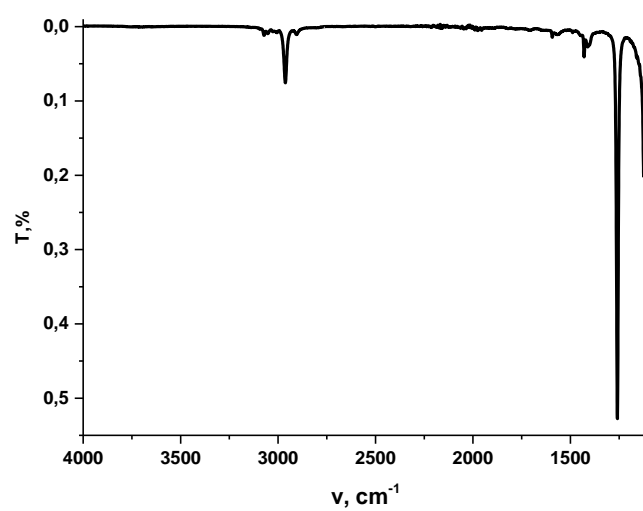

Figure S4. IR spectra of 1,1,3,3,5,5,7-heptamethyl-7-phenylcyclotetrasiloxane

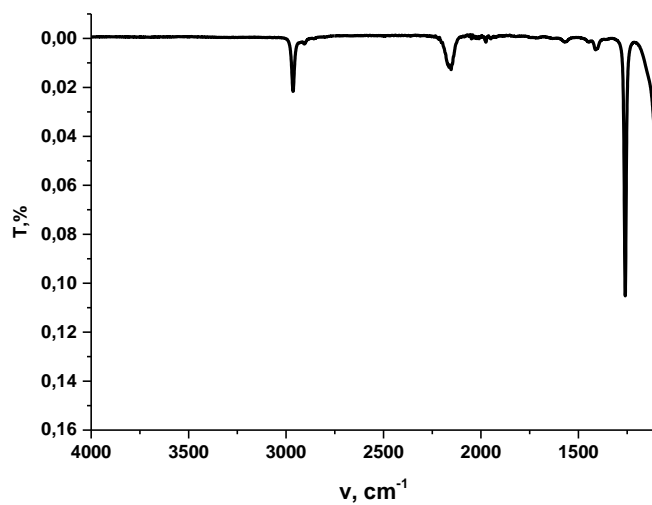

Figure S5. IR spectra of 7-hydro-1,1,3,3,5,5,7-heptamethylcyclotetrasiloxane

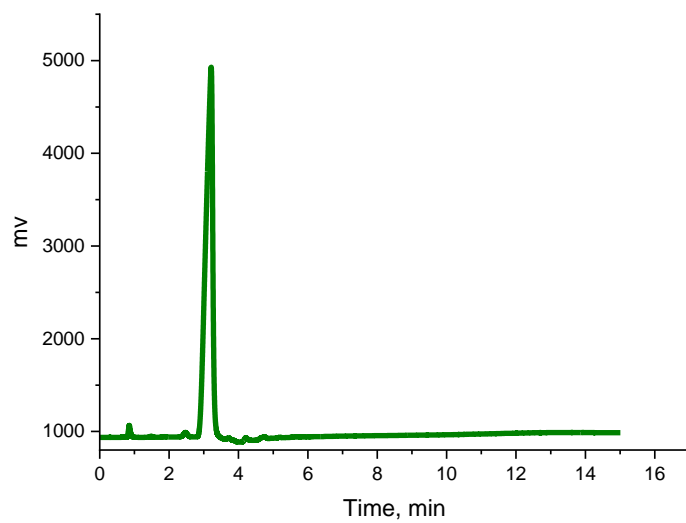

Figure S6. GLC curve of 1,1,3,3,5,5,7-heptamethyl-7-vinylcyclotetrasiloxane

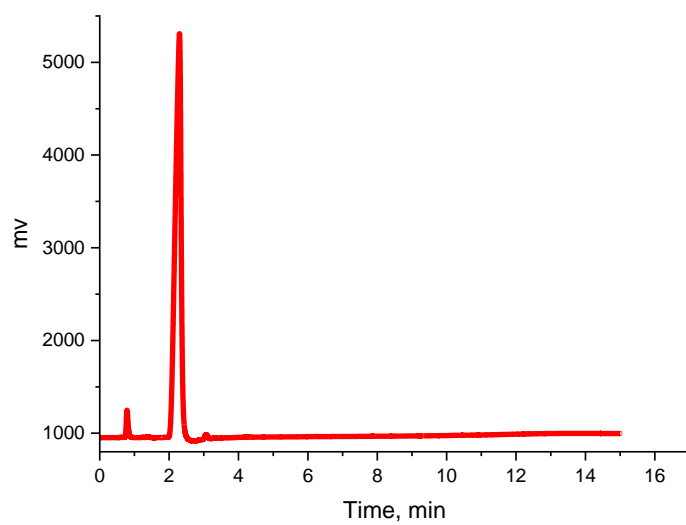

Figure S7. GLC curve of 7-hydro-1,1,3,3,5,5,7-heptamethylcyclotetrasiloxane

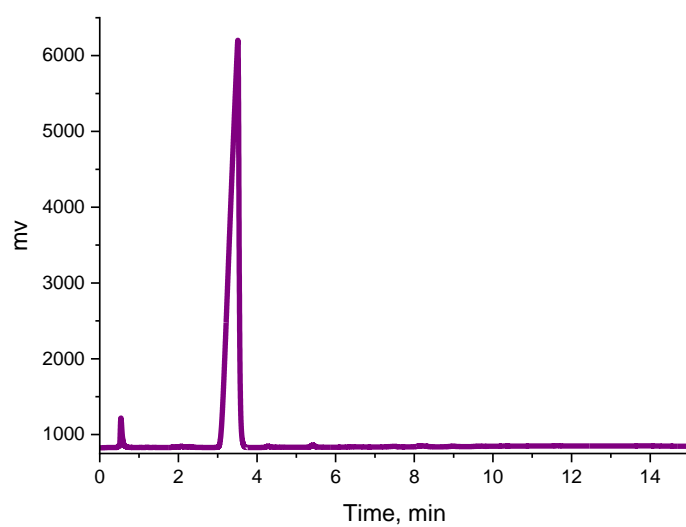

Figure S8. GLC curve of 7,7-diethyl-1,1,3,3,5,5-hexamethylcyclotetrasiloxane

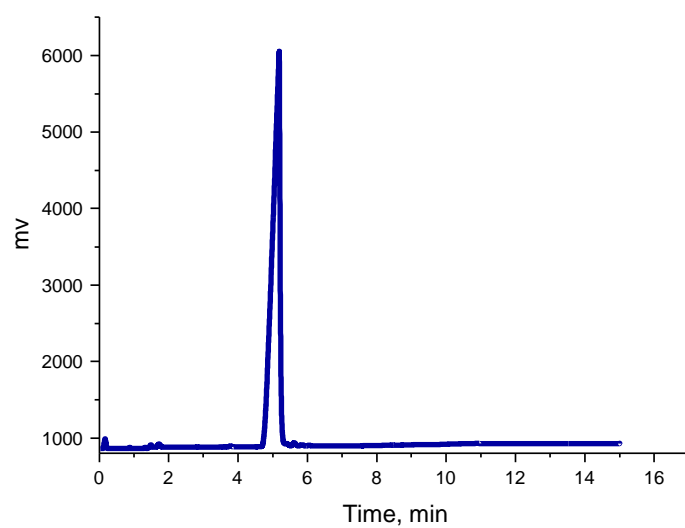

Figure S9. GLC curve of 1,1,3,3,5,5,7-heptamethyl-7-phenylcyclotetrasiloxane

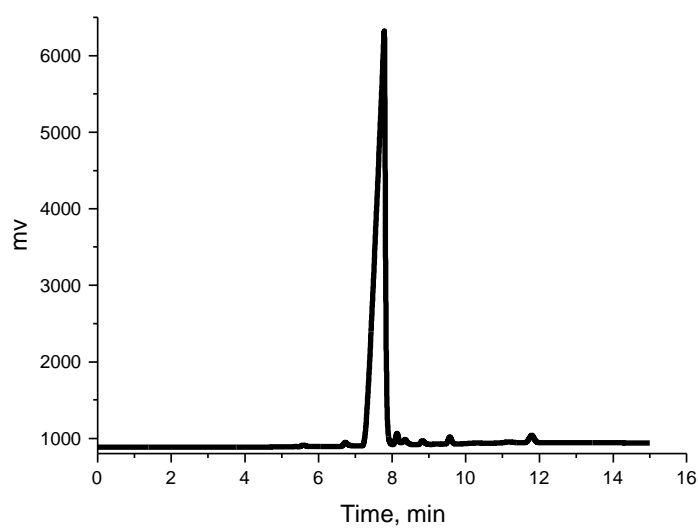

Figure S10. GLC curve of 1,1,3,3,5,5-hexamethyl-7,7-diphenylcyclotetrasiloxane

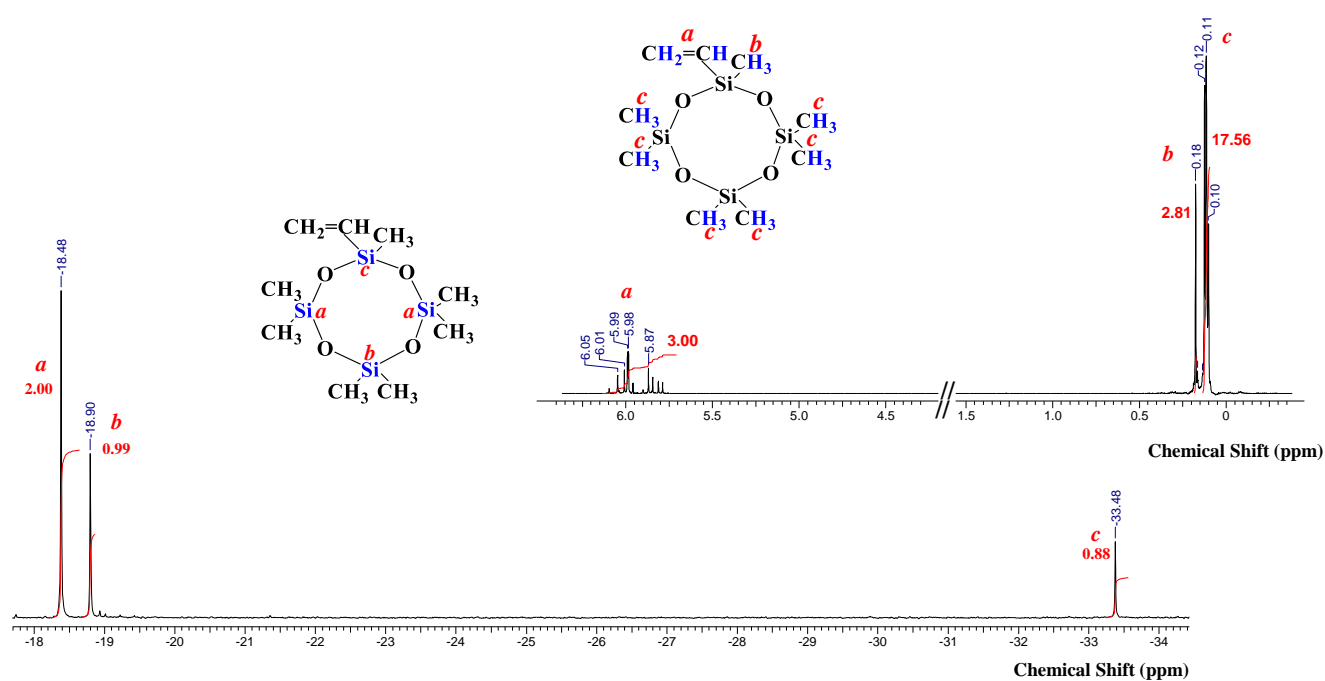

Figure S11.  $^1\text{H}$  (top) and  $^{29}\text{Si}$  (bottom) NMR spectra for 1,1,3,3,5,5,7-heptamethyl-7-vinylcyclotetrasiloxane

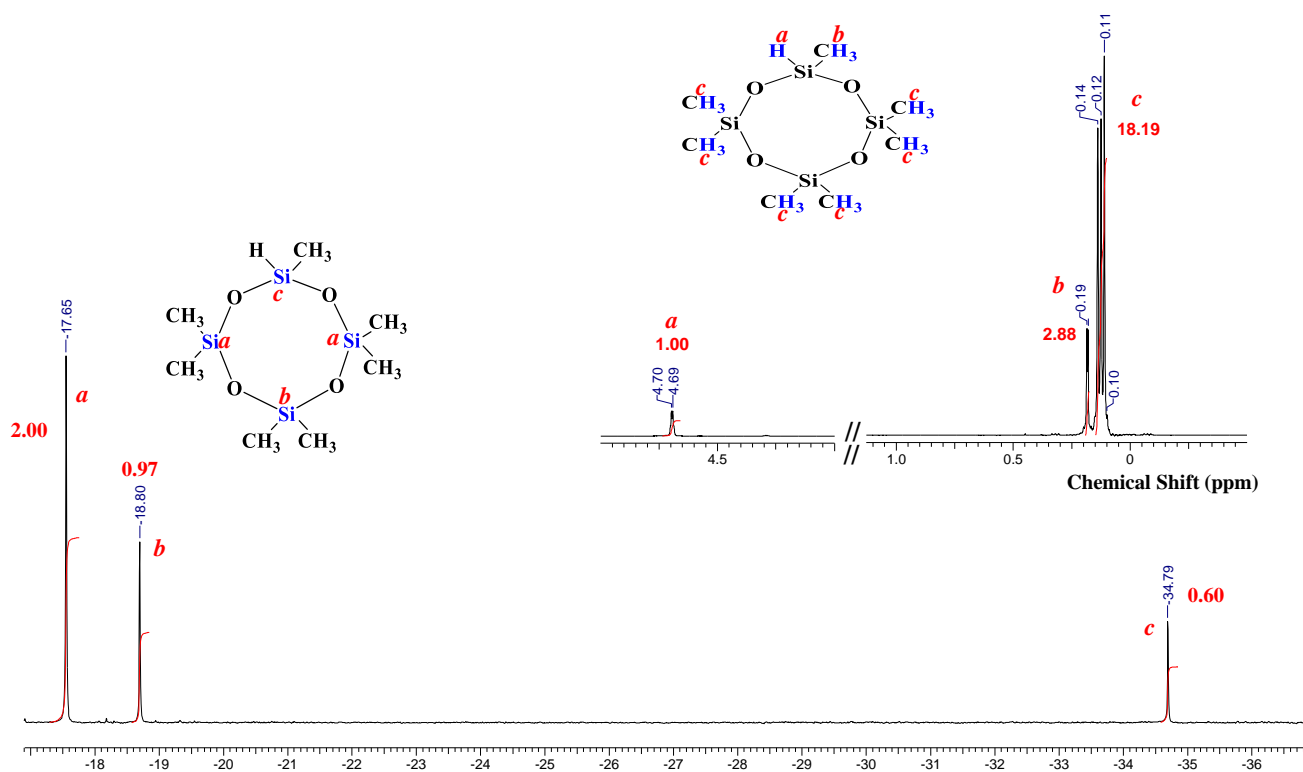Figure S12.  $^1\text{H}$  (top) and  $^{29}\text{Si}$  (bottom) NMR spectra for 7-hydro-1,1,3,3,5,5,7-heptomethylcyclotetrasiloxane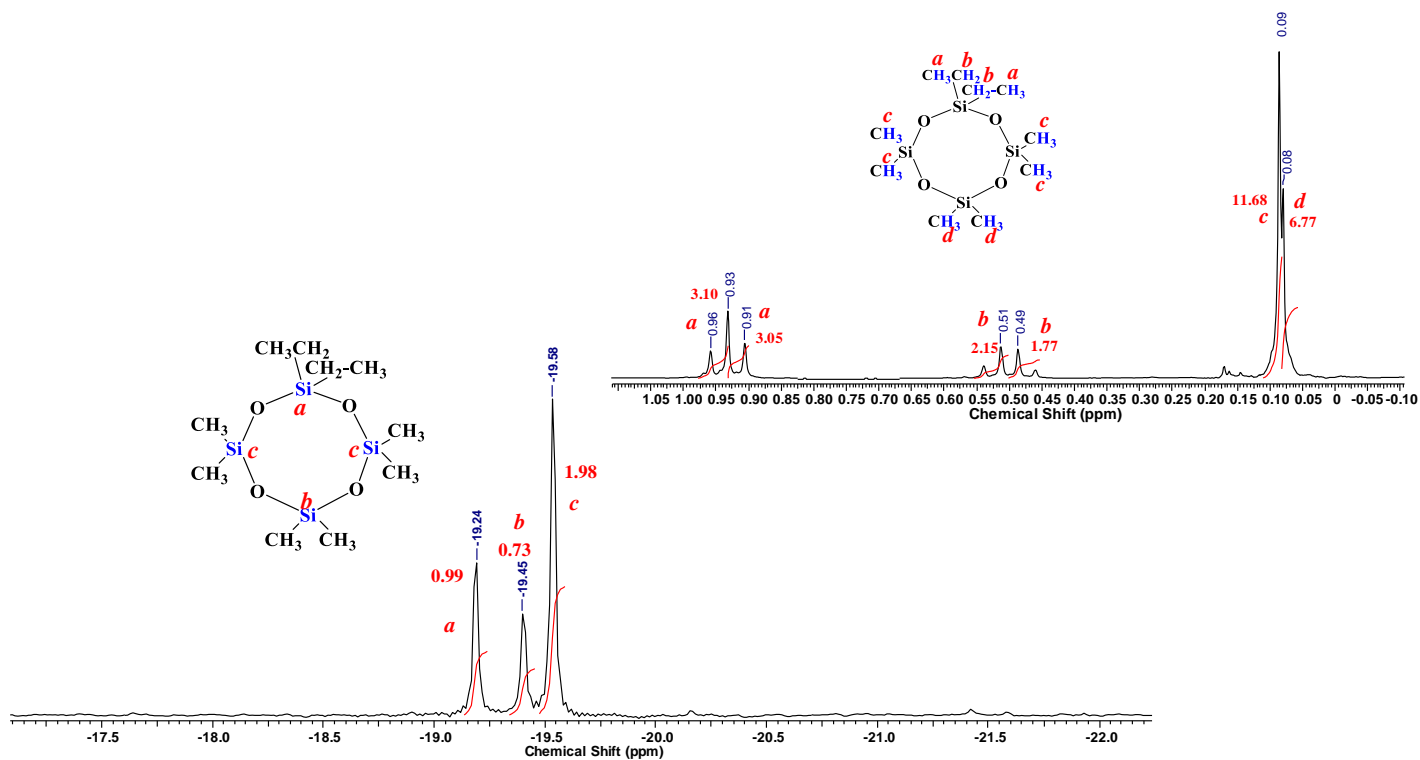Figure S13.  $^1\text{H}$  (top) and  $^{29}\text{Si}$  (bottom) NMR spectra for 7,7-diethyl-1,1,3,3,5,5-hexamethylcyclotetrasiloxane

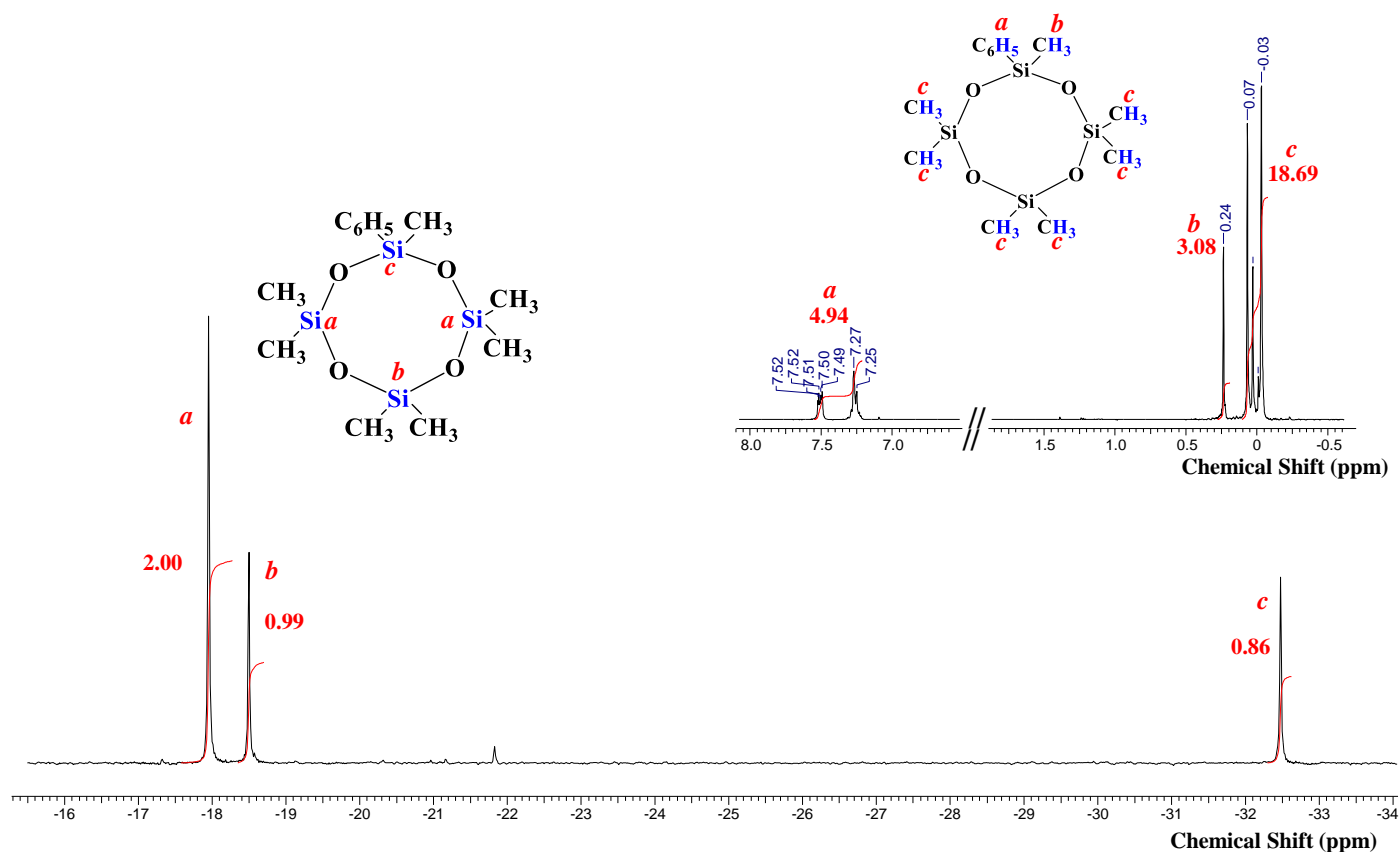Figure S14.  $^1\text{H}$  (top) and  $^{29}\text{Si}$  (bottom) NMR spectra for 1,1,3,3,5,5,7-heptamethyl-7-phenylcyclotetrasiloxane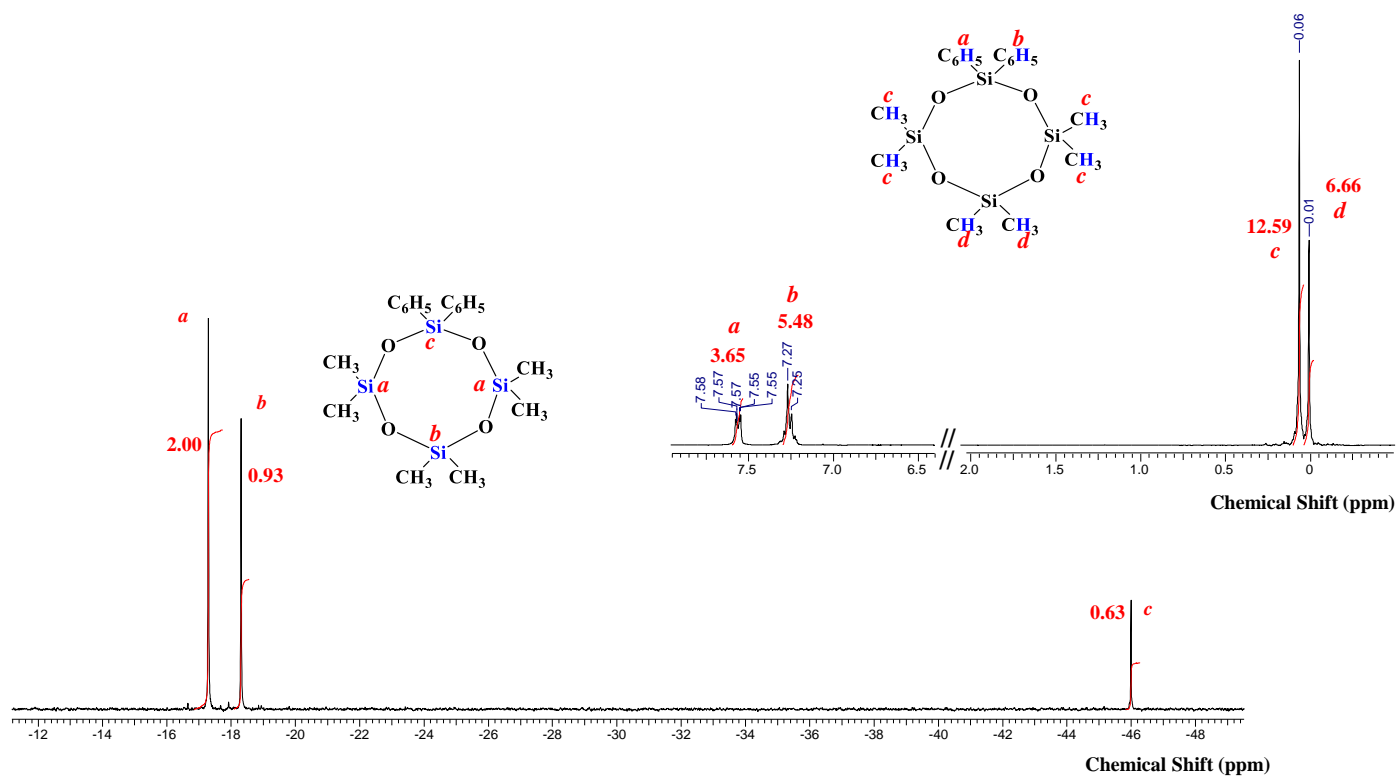Figure S15.  $^1\text{H}$  (top) and  $^{29}\text{Si}$  (bottom) NMR spectra for 1,1,3,3,5,5-hexamethyl-7,7-diphenylcyclotetrasiloxane



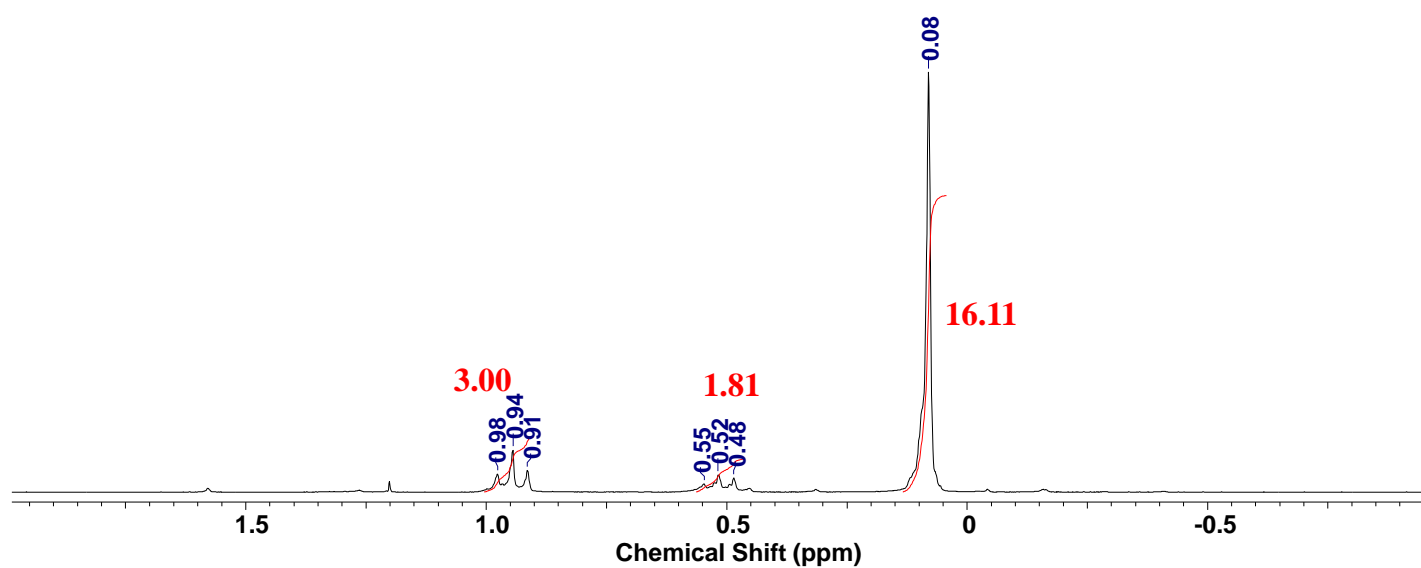

Figure S16.  $^1\text{H}$  NMR spectra for copolymers from  $[\text{DMe}_2]_4$  and  $[\text{DEt}_2]_4$  (No 1, Table 3)

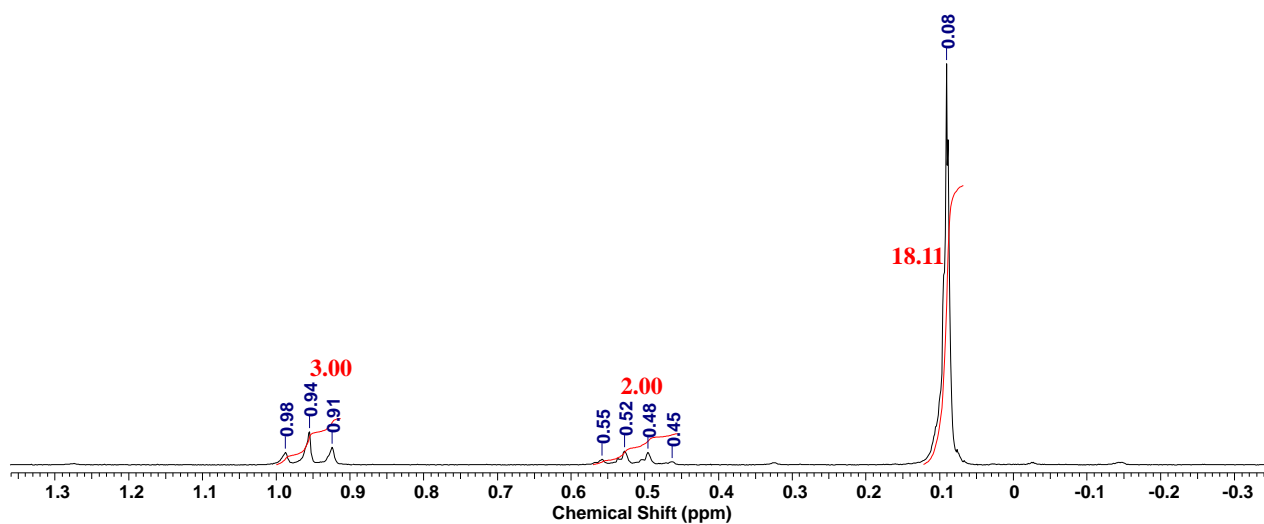

Figure S17.  $^1\text{H}$  NMR spectra for copolymers from  $[\text{DMe}_2]_4$  and  $[\text{DMe}_2]_3[\text{DEt}_2]$  (No 2, Table 3)

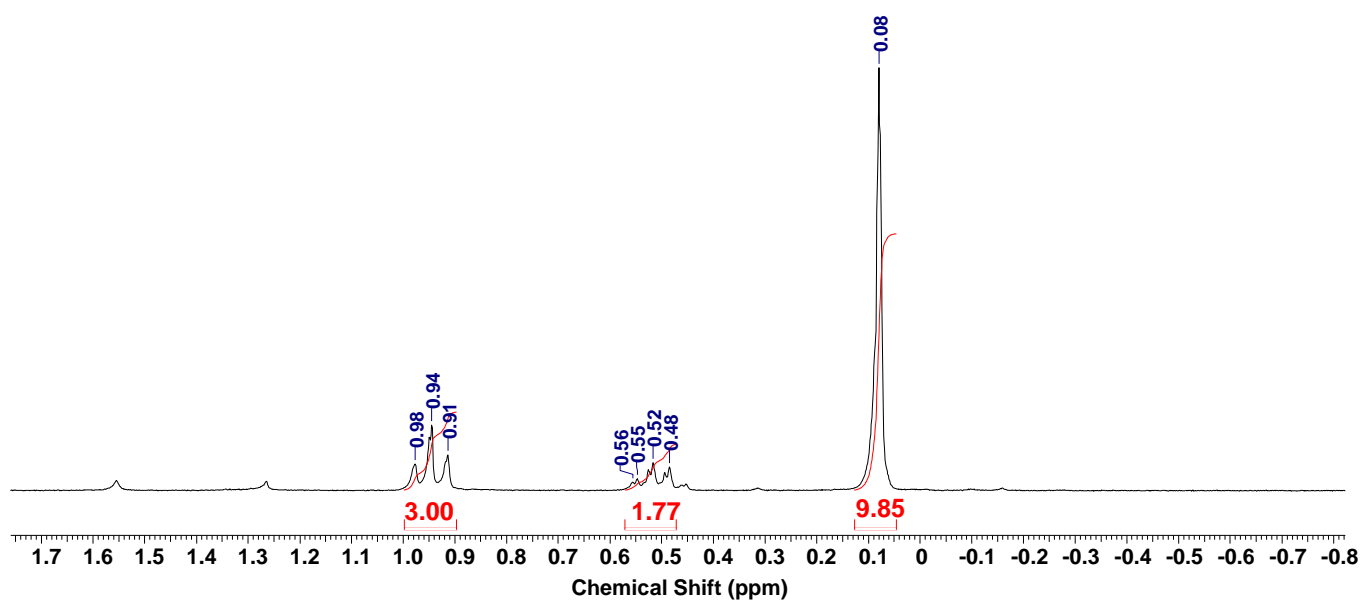

Figure S18.  $^1\text{H}$  NMR spectra for copolymer from  $[(\text{D}^{\text{Me}_2})_3(\text{D}^{\text{Et}_2})]$  (No 3, Table 3)

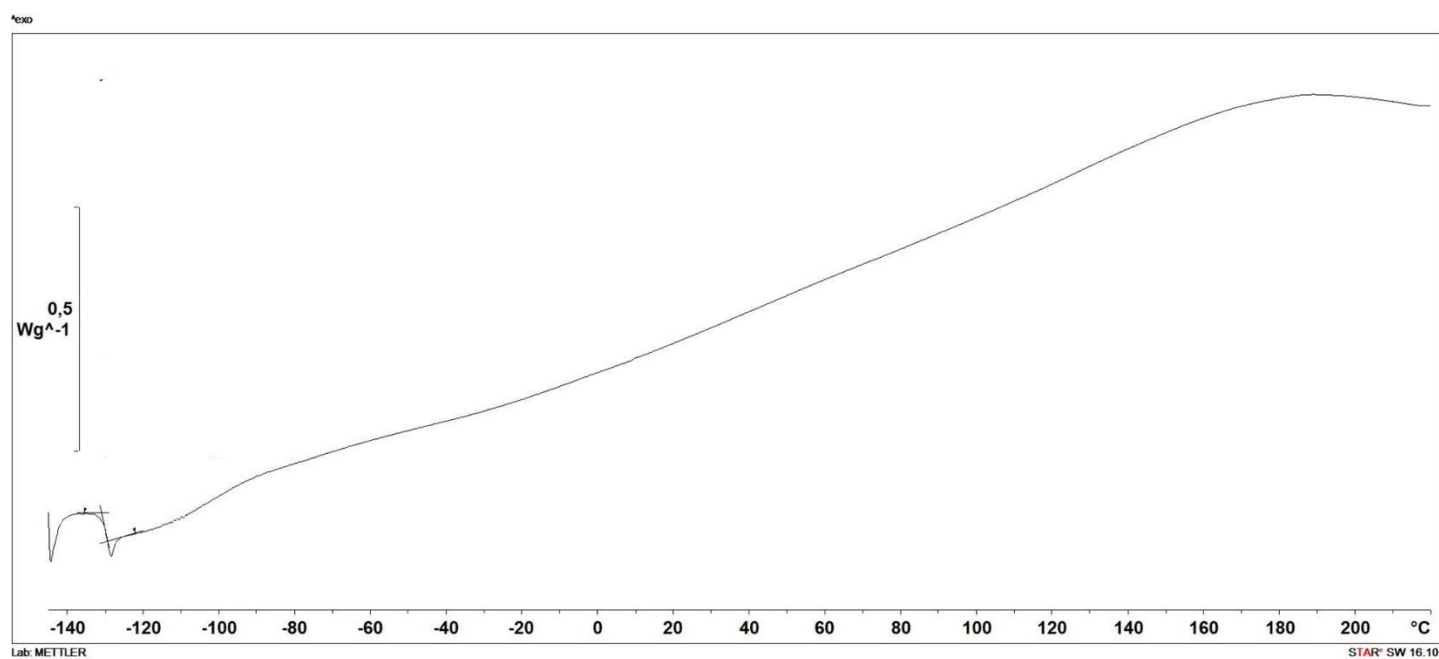

Figure S19. DSC curves of copolymer from  $[(\text{D}^{\text{Me}_2})_4]$  and  $[(\text{D}^{\text{Me}_2})_3(\text{D}^{\text{Et}_2})]$  (No2, Table 3)

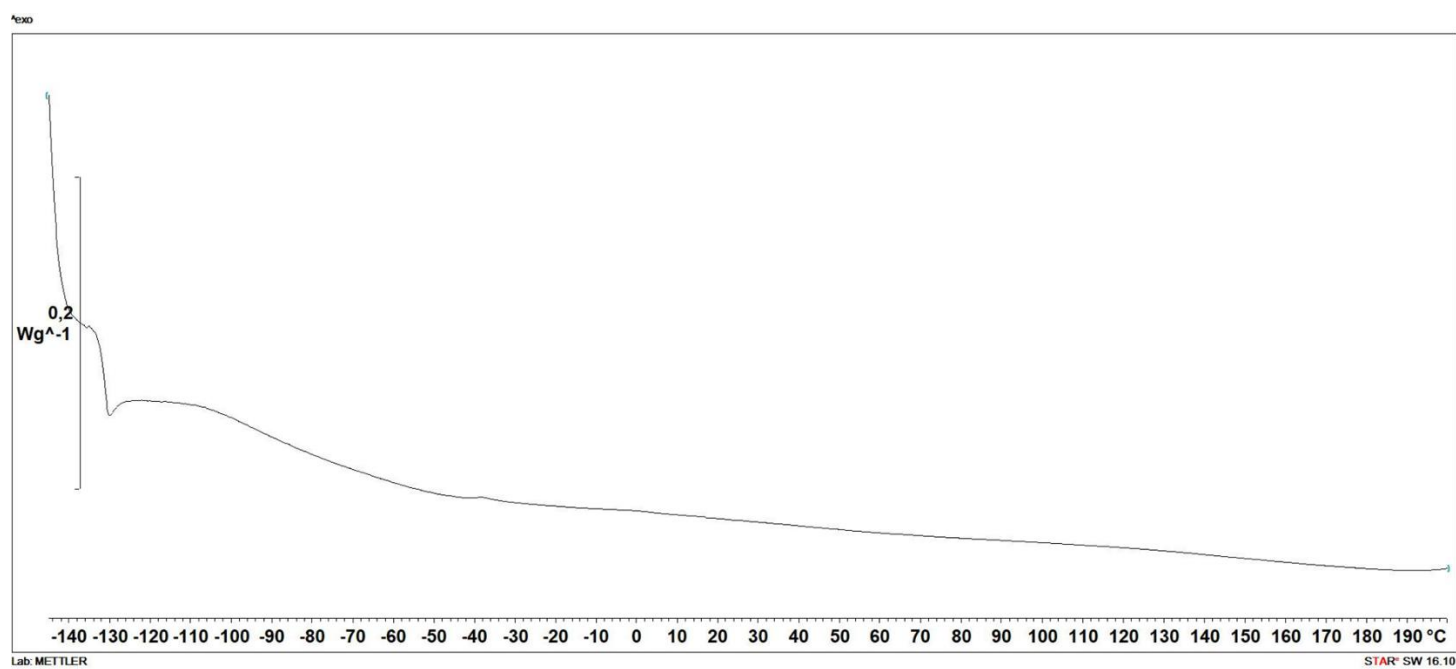

Figure S20. GPC curves of copolymer  $[(D^{Me_2})_3(D^{Et_2})]$  (№3, Table 3)
